# Supplementary material
Source: Springer Nature journal article supplement (https://www.springermedizin.de/resource/supplementary/12985_2012_2134_MOESM6_ESM.pdf/9606692)

1

2

3

45 kDa

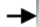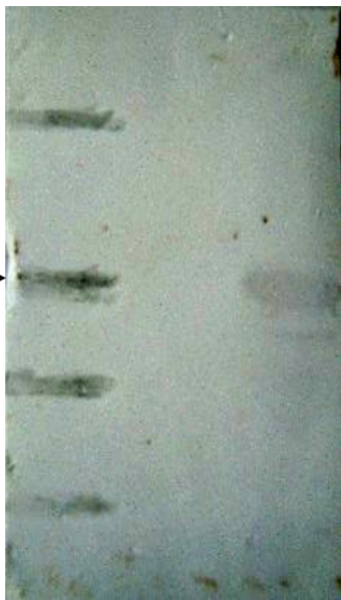

VP6

48 kDa

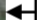

Supplement: MOESM6 [file 9606692]
